# Supplementary material for: Effects of a Fishing Ban on the Ecosystem Stability and Water Quality of a Plateau Lake: A Case Study of Caohai Lake, China
Source: MDPI journal article supplement (doi:10.3390/w16050782), 2024-03-06
Supplement: s1 [file s1]

### Supplementary materials

Table S1. Detailed locations of sampling sites in Caohai Lake

| Sampling points | Longitude and latitude   |
|-----------------|--------------------------|
| 1               | N26°50.043' E104°16.821' |
| 2               | N26°50.816' E104°15.122' |
| 3               | N26°50.418' E104°15.350' |
| 4               | N26°51.104' E104°14.652' |
| 5               | N26°51.034' E104°14.803' |
| 6               | N26°51.015' E104°14.797' |
| 7               | N26°50.892' E104°14.923' |
| 8               | N26°51.907' E104°13.342' |
| 9               | N26°51.512' E104°13.065' |
| 10              | N26°52.118' E104°13.309' |
